# Supplementary material
Source: PubMed Central journal article supplement (PMC2853430)
Supplement: supp_M002378_jlr.M002378-1.pdf [file supp_M002378_jlr.M002378-1.pdf]

**Figure S1.** Breeding scheme for the five different HL genotypes generated.

**Figure S2.** Multiple sequence alignment of B6-, SPRET- and human-HL using Clustal W2 ([www.ebi.ac.uk/clustalw/](http://www.ebi.ac.uk/clustalw/)). \* = identical residues. : = conserved substitutions. . = semi-conserved substitutions. ■ = substitutions between B6- and SPRET-HL only. □ = signal peptide. [ ] = Polycystin-1, Lipxygenase, Alpha-Toxin (PLAT) domain. ■ = active site. Bolded text = lid domain. Underlined = heparin binding.

Figure S1.

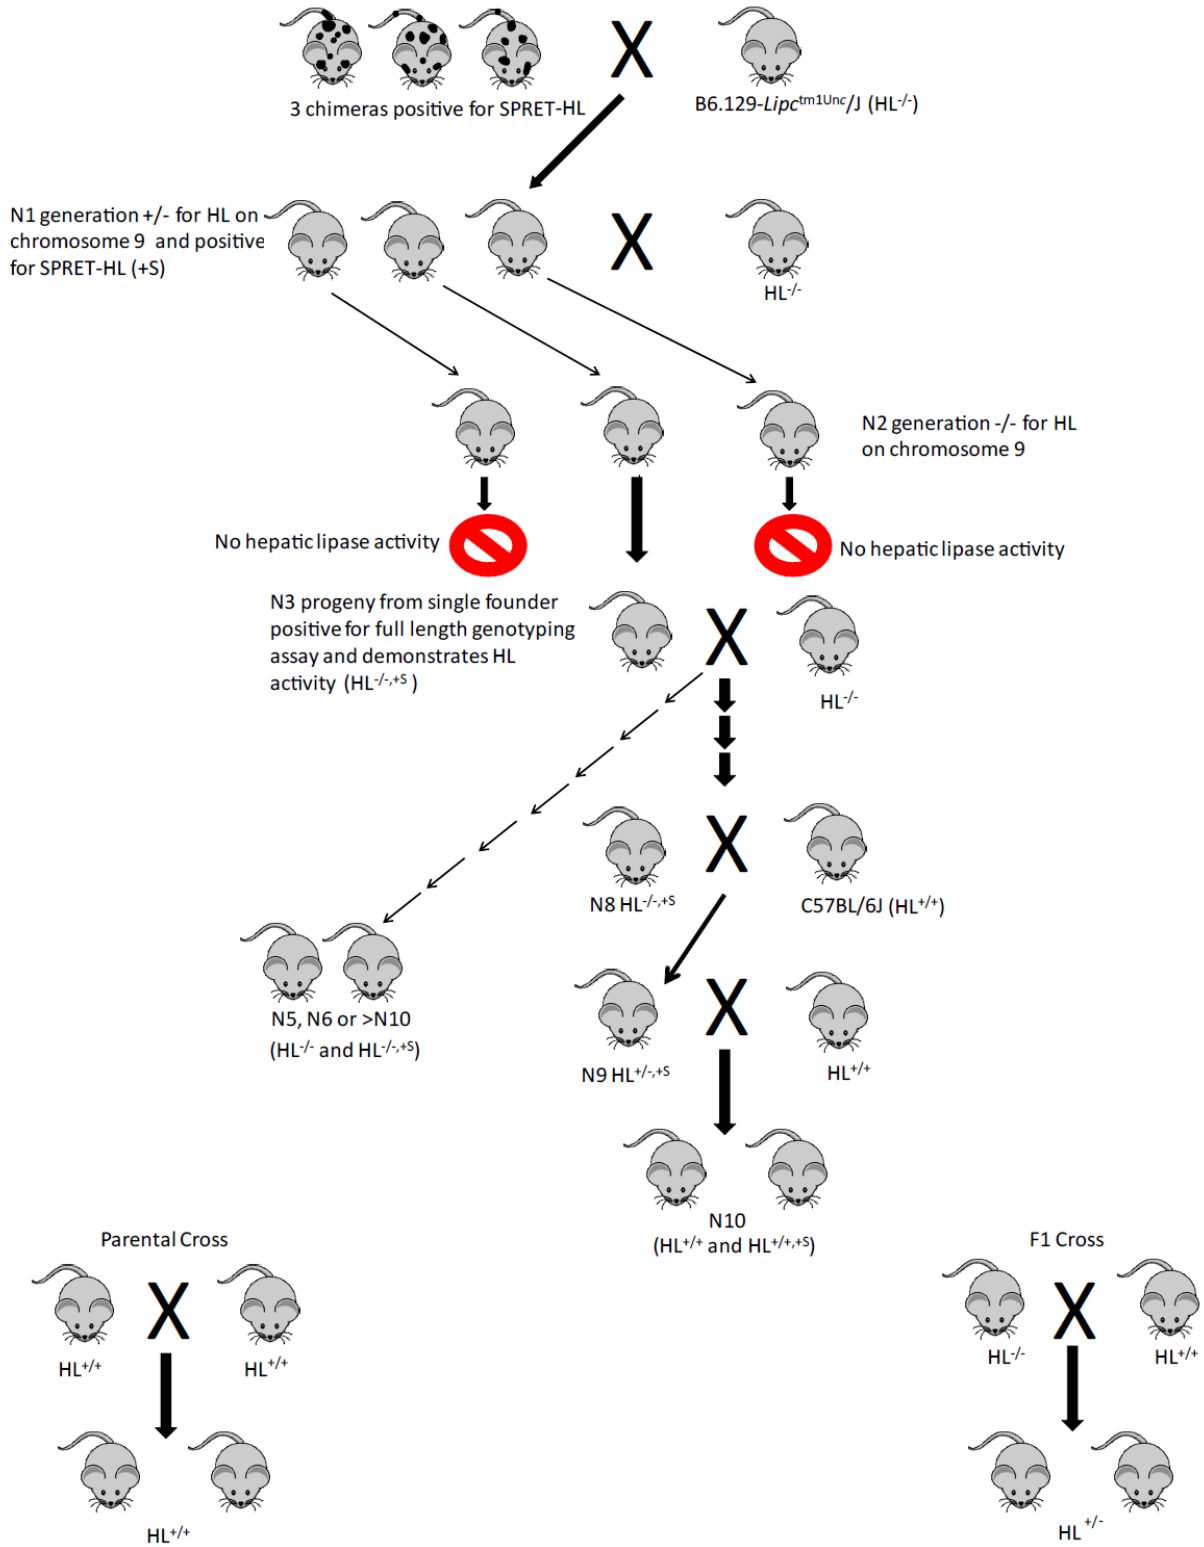

**Figure S2.**

```
AY228765 (B6-HL)      MGN-PLQISIFLVFCIFIQSSACGQGVGTEPFGRSLGATEASKPLKKPET 49
AY225159 (SPRET-HL)  MGN-PLQISIFLVFCIFIQSSACGQGVGTEPFGRSLGATEASKPLKKPET 49
AAA59521 (Human-HL)  MDTSPLCFSILLVLCIFIQSSALGQSLKPEPFGRRAQAVETNKTLHEMKT 50
*.. ** :*:*:*:***** **.: .***** *.*:.*.*:: :*
AY228765 (B6-HL)      RLLLFQDENDRLGCRLRPQHPETLQECGFNSSQPLIMI IHGWSVDGLEN 99
AY225159 (SPRET-HL)  RLLLFQDENDRLGCRLRPQHPETLQECGFNSSQPLIMI IHGWSVDGLEN 99
AAA59521 (Human-HL)  RLLLFGETN--QGCQIRINHPDTLQECGFNSSLPLVMI IHGWSVDGVLEN 98
***** : * **::* :*:***** **.:*****:***
AY228765 (B6-HL)      WIWKIVSALKSRQSQPVNVGLVDWISLAYQHYTIAVQNTRIVGQDVAALL 149
AY225159 (SPRET-HL)  WIWKIVNALKSRQSQPVNVGLVDWISLAYQHYTIAVQNTRIVGQDVAALL 149
AAA59521 (Human-HL)  WIWQMVAALKSQPAQPVNVGLVDWITLAHDHYTIAVRNTRLVGKEVAALL 148
***::* ****: :*****:***:*****:***:***:*****
AY228765 (B6-HL)      LWLEESAKFSRSKVHLIGYSLGAHVSGFAGSSMDGKNKIGRITGLDPAGP 199
AY225159 (SPRET-HL)  LWLEESVKFSRSKVHLIGYSLGAHVSGFAGSSMDGKNKIGRITGLDPAGP 199
AAA59521 (Human-HL)  RWLEESVQLSRSHVHLIGYSLGAHVSGFAGSSIGGTHKIGRITGLDAAGP 198
***** .::*:*****:*****:*.*.*****:***
```

AY228765 (B6-HL) MFEGTSPNERLSPDDANFVDIAHTFTREHMGLSVGIKQPIAHYDFYPNGG 249

AY225159 (SPRET-HL) MFEGTSPNERLSPDDANFVDIAHTFTREHMGLSVGIKQPIAHYDFYPNGG 249

AAA59521 (Human-HL) LFEGSAPSNRLSPDDASFVDIAHTFTREHMGLSVGIKQPIGHYDFYPNGG 248

:\*\*\*:\*. :\*\*\*\*\*.\*\*\*\*\*.\*\*\*\*\*

AY228765 (B6-HL) SFQPGCHFLELYKHIAEHGLNAITQTIKCAHERSVHLFIDSLQHSDLQSI 299

AY225159 (SPRET-HL) SFQPGCHFLELYKHIAEHGLNAITQTIKCAHERSVHLFIDSLQHSDLQSI 299

AAA59521 (Human-HL) SFQPG**CHFLELYRHIAQHGFNAITQTIKCS**HERSVHLFIDSL LHAGTQSM 298

\*\*\*\*\*:\*\*\*:\*. :\*\*\*\*\*:\*\*\*\*\* \*:. \*\*:

AY228765 (B6-HL) GFQCSDMGFSFSQGLCLCKKGRCNTLGYDIRKDRSGKSKRFLITRAQSP 349

AY225159 (SPRET-HL) GFQCSDMGFSFSQGLCLCKKGRCNTLGYDIRKDRSGKSKRFLITRAQSP 349

AAA59521 (Human-HL) AYPCGDMNSFSQGLCLCKKGRCNTLGYHVRQEPRSKSKRFLVTRAQSP 348

.: \*.\*\*.\*\*\*\*\*\*. :\*: : .\*\*\*\*\*:\*\*\*\*\*

AY228765 (B6-HL) FKVYHYQFKIQFINQIEKPVEPTFTMSLLGTKEEIKRIPITLGEGITSNK 399

AY225159 (SPRET-HL) FKVYHYQFKIQFINQIEKPVEPTFTMSLLGTKEEIKRIPITLGEGITSNK 399

AAA59521 (Human-HL) FKVYHYQLKIQFINQ**TETPIQT**TFTMSLLGTKEKMQIPITLGKGIASNK 398

\*\*\*\*\*:\*\*\*\*\* \*.\*: :\*\*\*\*\*: :\*: :\*\*\*\*\*:\*\*\*:\*\*\*

AY228765 (B6-HL) TYSFLITLDDKDIGELI L LKFKWENSAVWANVWNTVQTIMLWGIEPHHSGL 449

AY225159 (SPRET-HL) TYSFLITLDDKDIGELI M LKFKWENSAVWANVWNTVQTIMLWGIEPHHSGL 449

AAA59521 (Human-HL) TYSFLITLDDVDIGELIMIKFKWENSAVWANVWDTVQTIIPWSTGPRHSGL 448

\*\*\*\*\* \*\*\*\*\*:\*\*\*\*\*:\*\*\*\*\*: \* . \*:\*\*\*\*\*

AY228765 (B6-HL) ILKTIWVKAGETQQRMTFCPENLDDLQLHP S QEKVFNCEVKSRLTESK 499

AY225159 (SPRET-HL) ILKTIWVKAGETQQRMTFCPENLDDLQLHP T QEKVFNCEVKSRLTESK 499

AAA59521 (Human-HL) VLKTIWVKAGETQQRMTFCSENTDDLRLRPTQEKIFVKCEIKSK---TSK 495

:\*\*\*\*\* \*\*\*\*\*.\* \* \* \* \*:\*:\*\*\*:\*\*\*:\*\*\*:\*\*\* \*\*

AY228765 (B6-HL) EQMSQETHAKK 510

AY225159 (SPRET-HL) EQMSQETHAKK 510

AAA59521 (Human-HL) RKIR----- 499
